# Supplementary material for: Large-scale gene co-expression network as a source of functional annotation for cattle genes
Source: PubMed Central journal article supplement (PMC5094014; doi:10.1186/s12864-016-3176-2), 2016-11-02

A

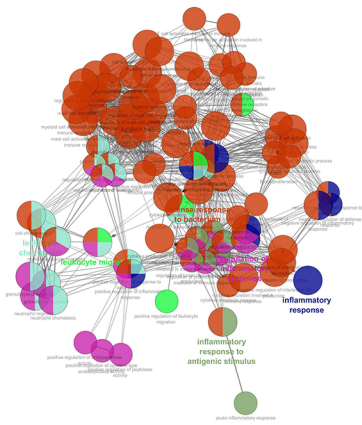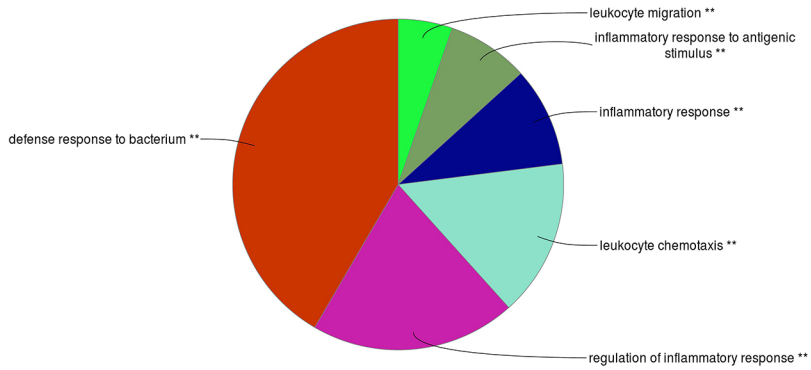

B

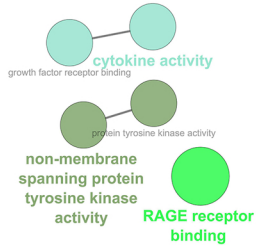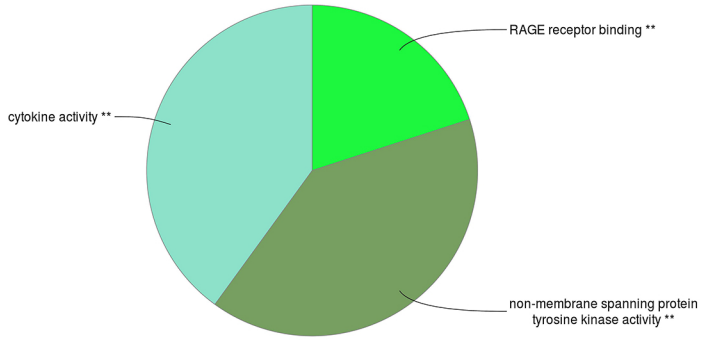

C

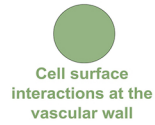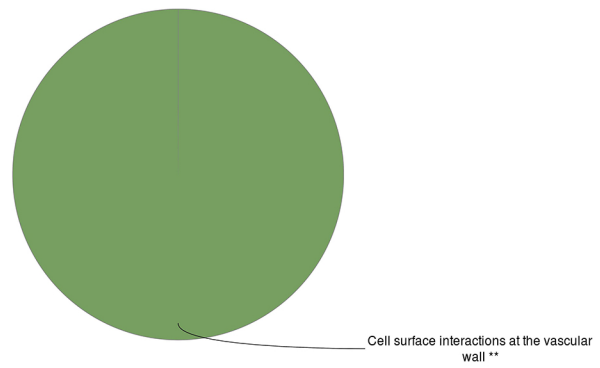

Supplement: 12864_2016_3176_MOESM5_ESM.pdf [file 12864_2016_3176_MOESM5_ESM.pdf]
